# Supplementary material for: Quantitative Structure–Activity Relationships of Natural-Product-Inspired, Aminoalkyl-Substituted 1-Benzopyrans as Novel Antiplasmodial Agents
Source: MDPI journal article supplement (doi:10.3390/molecules26175249), 2021-08-30
Supplement: s1 [file s1]

*Supplementary Materials*

# Quantitative Structure-Activity Relationships of Natural-Product-Inspired, Aminoalkyl-Substituted 1-Benzopyrans as Novel Antiplasmodial Agents

Friederike M. Wunsch<sup>1</sup>, Bernhard Wünsch<sup>2</sup>, Freddy A. Bernal<sup>1,3</sup> and Thomas J. Schmidt<sup>1,\*</sup>

<sup>1</sup> Institute of Pharmaceutical Biology and Phytochemistry (IPBP), PharmaCampus, Corrensstrasse 48, D-48149 Münster, Germany; Friederike.Wunsch@gmx.de (F.M.W.); thomschml@uni-muenster.de (T.J.S.)

<sup>2</sup> Institute of Pharmaceutical and Medicinal Chemistry (IPMC), PharmaCampus, Corrensstrasse 48, D-48149 Münster, Germany; wuensch@uni-muenster.de

<sup>3</sup> Current Address: Transfer Group Anti-infectives, Leibniz Institute for Natural Product Research and Infection Biology, HKI, Beutenbergstraße 11a, 07745 Jena, Germany; Freddy.Bernal@hki-jena.de

\* Correspondence: thomschm@uni-muenster.de; Tel.: +49 251 83 33378

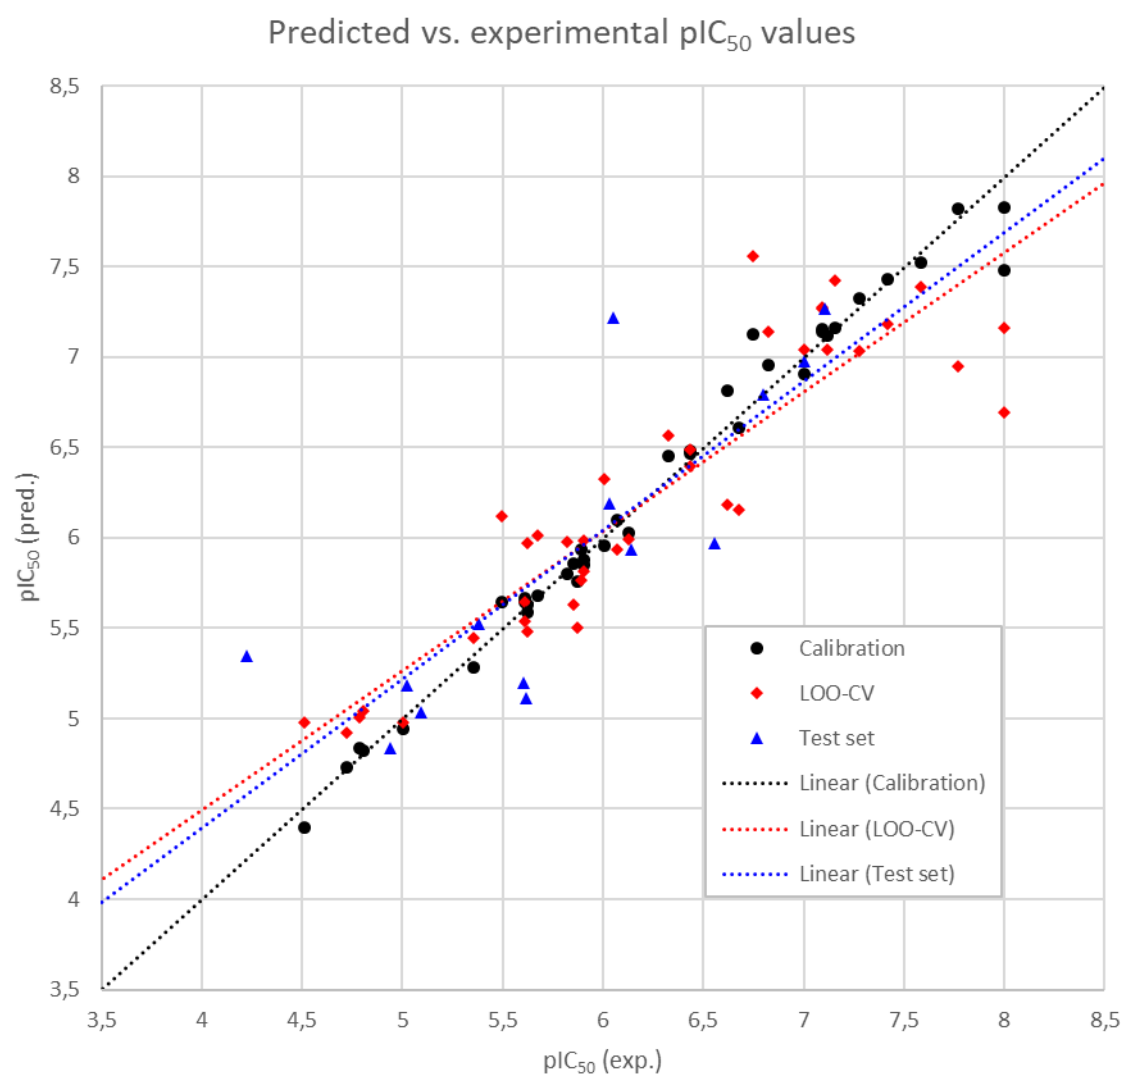

**Figure S1.** Plot of predicted vs. experimental  $\text{pIC}_{50}$  values of model K.

**Table S1.** Test sets in models A-T.

| Model | Test set compounds (n=14 $\approx$ 26%)                |
|-------|--------------------------------------------------------|
| A     | 2, 5, 19, 24, 25, 26, 27, 31, 33, 38, 42, 45, 49, 52   |
| B     | 10,14, 18,19, 23, 25, 27, 30, 38, 42, 45, 46, 50, 52   |
| C     | 9, 13, 27, 30, 32, 34, 38, 40, 42, 45, 47, 49, 50, 53  |
| D     | 19, 23, 27, 30, 32, 34, 38, 40, 42, 45, 47, 49, 50, 53 |
| E     | 10, 14, 15, 19, 24, 26, 27, 38, 41, 43, 45, 46, 48, 53 |
| F     | 2, 10, 19, 24, 26, 27, 30, 31, 38, 39, 41, 42, 45, 48  |
| G     | 9, 13, 15, 19, 24, 26, 27, 38, 41, 43, 45, 46, 48, 53  |
| H     | 9, 13, 17, 18, 24, 26, 27, 38, 41, 43, 45, 46, 48, 53  |
| I     | 9, 13, 15, 19, 22, 27, 28, 38, 41, 43, 45, 46, 48, 53  |
| J     | 9, 13, 15, 19, 22, 26, 27, 38, 41, 43, 45, 46, 48, 53  |
| K     | 9, 13, 15, 19, 23, 26, 27, 38, 41, 43, 45, 46, 48, 53  |
| L     | 9, 13, 15, 19, 24, 26, 27, 37, 40, 43, 45, 46, 48, 53  |
| M     | 9, 13, 15, 19, 24, 26, 27, 32, 38, 41, 44, 46, 48, 53  |
| N     | 9, 13, 15, 19, 24, 26, 28, 32, 38, 41, 44, 46, 48, 53  |
| O     | 9, 13, 14, 18, 24, 26, 27, 38, 41, 43, 45, 46, 48, 53  |
| P     | 9, 13, 15, 19, 24, 26, 27, 38, 41, 43, 45, 46, 47, 52  |
| Q     | 9, 13, 15, 19, 24, 26, 31, 35, 41, 43, 45, 46, 48, 53  |
| R     | 2, 10, 15, 19, 24, 26, 27, 38, 41, 43, 45, 46, 48, 53  |
| S     | 2, 10, 15, 19, 23, 26, 27, 31, 38, 41, 45, 46, 48, 53  |
| T     | 9, 13, 15, 19, 24, 26, 27, 33, 36, 43, 45, 46, 48, 53  |
